# Supplementary material for: An artificial solid interphase with polymers of intrinsic microporosity for highly stable Li metal anodes
Source: Royal Society of Chemistry journal article supplement (doi:10.1039/c9cc01329f), 2019-01-01
Supplement: c9cc01329f1.pdf [file c9cc01329f1.pdf]

*Supplementary Information for*

**Artificial Solid Interphase with Polymers of Intrinsic  
Microporosity for Highly Stable Li Metal Anode**

Gi Hyeon Moon<sup>†</sup>, Hyun Jong Kim<sup>†</sup>, Il Seok Chae, Seul Chan Park, Byung Su Kim, Jaeyoung  
Jang, Hansu Kim<sup>\*</sup>, Yong Soo Kang<sup>\*</sup>

*Department of Energy Engineering, Hanyang University, Seoul 04763, Republic of Korea*

<sup>†</sup>These two authors contributed equally to this work

<sup>\*</sup>Yong Soo Kang : kangys@hanyang.ac.kr

<sup>\*</sup>Hansu Kim : khansu@hanyang.ac.kr

## Estimated mass of PIM-1 on Li metal

There is theoretical prediction of wet films thickness, which corresponds to the amount of loaded coating solution after doctor-blade method.<sup>S1</sup> Wet-film thickness can be obtained by the relationship as below

$$D = \frac{1}{2}h\left(1 + \frac{h^2P}{6\eta UL}\right)$$

D = Wet film thickness

h= Height of blade (50  $\mu\text{m}$ )

P= Pressure difference between top of solution and bottom of solution (43.5 Pa)

→ Pressure difference was calculated by multiplying density of solution (0.89  $\text{g}/\text{cm}^3$ , almost same to that of tetrahydrofuran), acceleration of gravity, height of blade.

$\eta$ = Viscosity of solution (0.48 cP, almost same to that of tetrahydrofuran)

U= Constant speed of blading (0.1 m/s)

L= Length of the plate (4 cm)

Wet-film thickness of PIM-1 layer based on the above-equation and coating condition was estimated to be as 25.5  $\mu\text{m}$ . Based on this wet-film thickness, the areal mass of PIM-1 layer with respect to the concentration of coating solution could be estimated as shown in Table S1.

**Table S1.** Estimated mass of PIM-1 per area based on calculated thickness of wet film

| Weight Percent of<br>PIM-1 solution (%) | Estimated mass of PIM-1<br>per area ( $\mu\text{g}/\text{cm}^2$ ) |
|-----------------------------------------|-------------------------------------------------------------------|
| 0.01                                    | 2.3                                                               |
| 0.05                                    | 11.3                                                              |
| 0.1                                     | 22.7                                                              |
| 0.5                                     | 113.5                                                             |

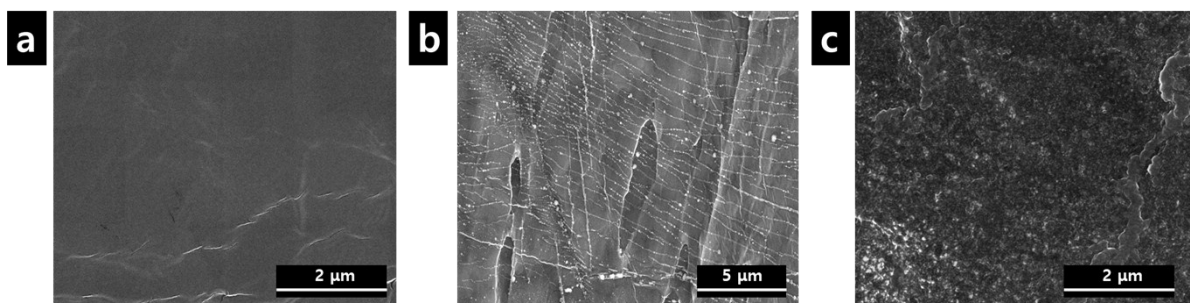

**Figure S1.** Top view images of bare Li metal (a) and 0.01 wt%, 0.1 wt% (b,c) PIM-1 coated Li metal before cycle test.

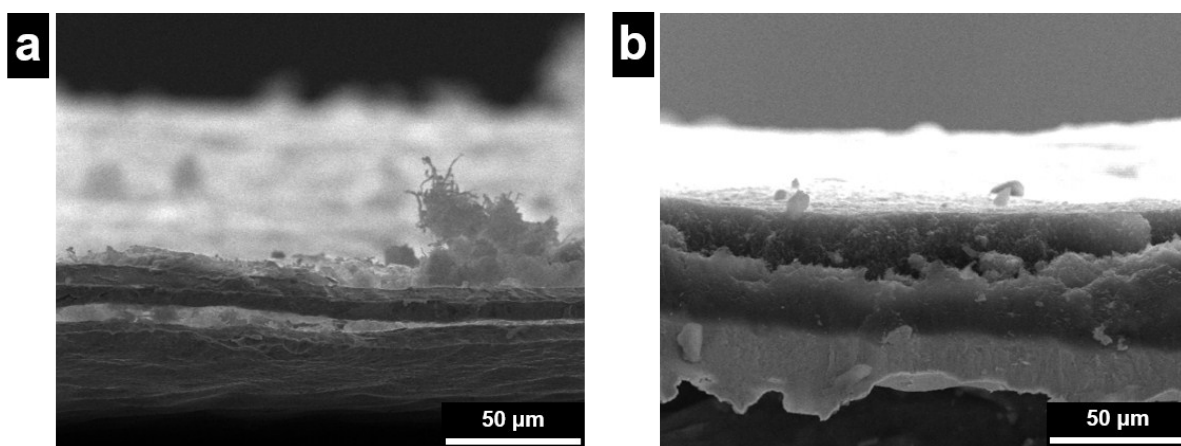

**Figure S2.** SEM images of (a) bare Cu foil and (b) PIM-1 0.1 wt% coated Cu foil after first Li deposition under  $3.0 \text{ mA cm}^{-2}$  at  $1.5 \text{ mA h cm}^{-2}$ .

After Li deposition on bare Cu foil (Fig. S2a), we found dendritic growth of Li deposits formed on the Cu foil, while PIM-1 coated Cu foil showed a smooth electrodeposited Li metal on the Cu foil (Fig. S2b).

## References

S1 Y. T. Chou, Y. T. Ko and M. F. Yan, *J. Am. Ceram. Soc.*, 1987, **70**, C-280.
